# Supplementary material
Source: PubMed Central journal article supplement (PMC521670)
Supplement: nar_32_17_5291__1.pdf [file nar_32_17_5291__1.pdf]

## **Supplementary Material**

### **Mutational analysis of the damage-recognition and catalytic mechanism of human SMUG1 DNA glycosylase**

Mayumi Matsubara, Tamon Tanaka, Hiroaki Terato, Eiji Ohmae, Shunsuke Izumi,  
Katsuo Katayanagi and Hiroshi Ide\*

Department of Mathematical and Life Sciences, Graduate School of Science, Hiroshima  
University, Higashi-Hiroshima 739-8526, Japan

Table S1

Table S2

Figure S1

Figure S2

Figure S3

**Table S1.** Oligonucleotide primers used to generate hSMUG1 mutants<sup>a</sup>

| Primer   | Mutation  | Sequence (5' →3') <sup>b</sup>                  |
|----------|-----------|-------------------------------------------------|
| T1-N85A  | Asn85Ala  | CCAAAAGGTCCAGGG <u>GC</u> CATGCCCAGGAAGAG       |
| T1-G87A  | Gly87Ala  | CCATGCCAAAAGGT <u>GC</u> CAGGGTTCATGCC          |
| T1-G87S  | Gly87Ser  | GGCCATGCCAAAAGGG <u>GCT</u> AGGGTTCATGCCCAGG    |
| T1-G87F  | Gly87Phe  | GGGCCATGCCAAAAGG <u>AAA</u> AGGGTTCATGCCCAGGAAG |
| T1-F89G  | Phe89Gly  | CTGGGCCATGCC <u>ACC</u> AGGTCCAGGGTTC           |
| T1-F89A  | Phe89Ala  | CTGGGCCATGCC <u>AGC</u> AGGTCCAGGGTTC           |
| T1-F89S  | Phe89Ser  | CTGGGCCATGCC <u>AGA</u> AGGTCCAGGG              |
| T1-G90A  | Gly90Ala  | CAGTCTGGGCCAT <u>GGC</u> AAAAGGTGCAGGG          |
| T1-M91A  | Met91Ala  | CCCCAGTCTGGGCC <u>CGC</u> GCCAAAAGGTCCAG        |
| T1-F98H  | Phe98His  | TGCTTACTTCCCC <u>ATG</u> GGGTACCCCAGTCTGGGCC    |
| T1-F98L  | Phe98Leu  | TGCTTACTTCCCC <u>CAG</u> GGGTACCCCAGTCTGGGCC    |
| T1-N163D | Asn163Asp | GCAGAGGGCGGCATAG <u>ATC</u> GTGGACAAAACAGTGATG  |
| T1-H239N | His239Asn | CGGGGAGAGGG <u>ATT</u> CAGGAGCCCTTCC            |
| T1-H239L | His239Leu | GGTTACGGGGAGAGGG <u>CAG</u> CAGGAGCCCTTCCAC     |

<sup>a</sup> Only the sequence of the sense-strand primer is shown. For site-directed mutagenesis, a set of sense-strand and antisense-strand primers were used.

<sup>b</sup> Italics indicate the substituted bases, and underlining indicates the mutagenized codon. In Phe98Leu and Phe98His mutants, an additional synonymous codon change (GCA→GTA, indicated in bold) was introduced to facilitate the screening of mutants.

**Table S2.** Kinetic parameters of selected hSMUG1 mutants for excision of hmU:G<sup>a</sup>

| Mutant    | $k_{cat}$<br>( $\text{min}^{-1}$ ) | $K_m$<br>(nM) | $k_{cat}/K_m$<br>( $\text{min}^{-1} \cdot \text{nM}^{-1}$ ) | Relative $k_{cat}/K_m$<br>(%) |
|-----------|------------------------------------|---------------|-------------------------------------------------------------|-------------------------------|
| Wild-type | 10                                 | 120           | 0.083                                                       | 100                           |
| N85A      | 0.85                               | 300           | 0.0028                                                      | 3.3                           |
| H239L     | 0.00077                            | 760           | 0.000010                                                    | 0.012                         |
| N163D     | 0.24                               | 320           | 0.00075                                                     | 0.90                          |

<sup>a</sup> Wild-type and mutant hSMUG1s were incubated with varying concentrations of 25HMU/G at 37 °C. After incubation, the sample was treated with 0.1 M NaOH, and nicked products were quantified by PAGE analysis. The concentration of the substrate, the amount of enzyme, and incubation time were adjusted to appropriate ranges depending on the enzyme activity such that the yield of products was linearly related to the amount of protein and incubation time. The maximum substrate concentration and incubation time, and the amount of enzyme were following: wild-type (500 nM, 5 min, 0.2 ng), N85A (1  $\mu\text{M}$ , 10 min, 5 ng), H239L (2.5  $\mu\text{M}$ , 60 min, 100 ng), and N163D (1  $\mu\text{M}$ , 15 min, 1 ng).

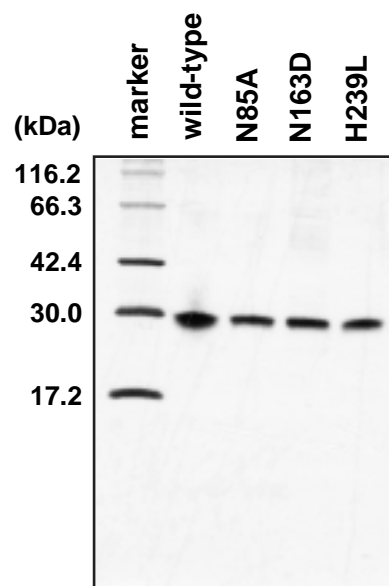

**Figure S1.** SDS-PAGE analysis of the wild-type and selected mutant hSMUG1 proteins.

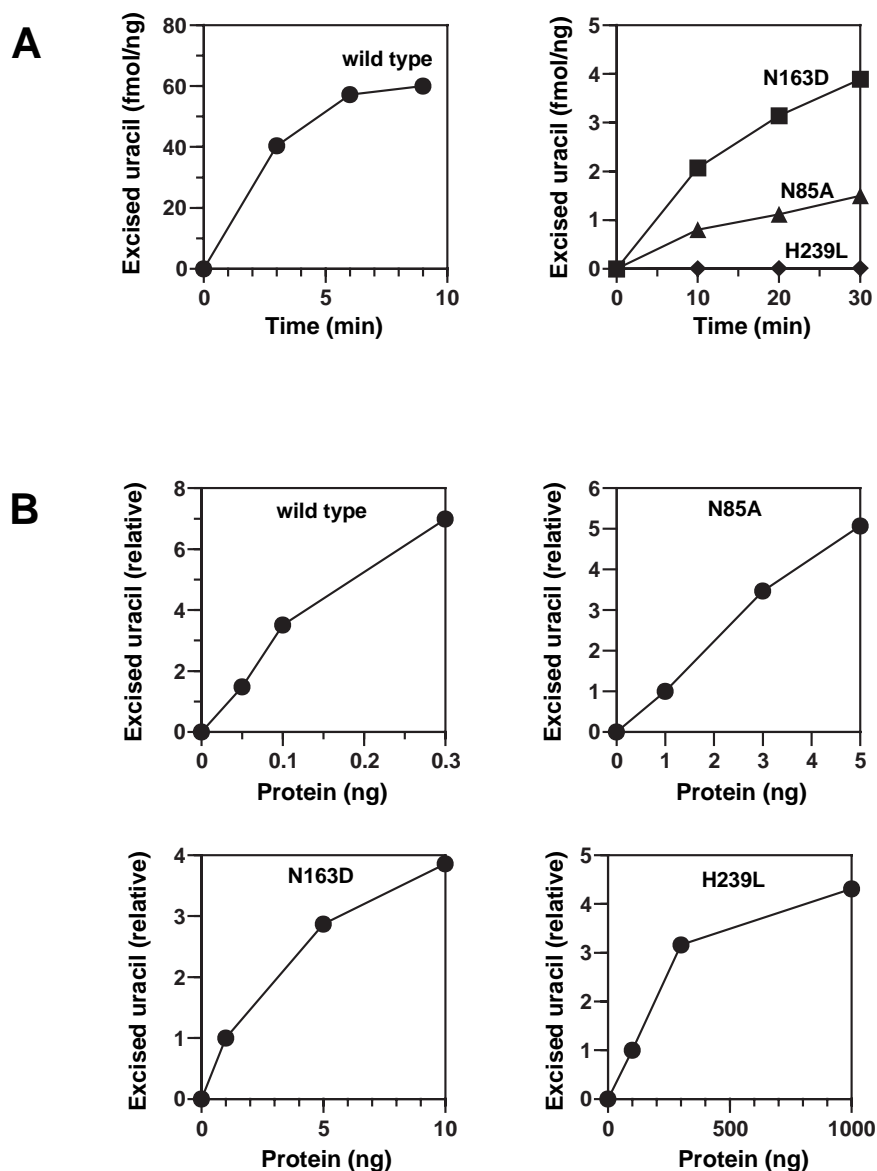

**Figure S2.** Typical data for the variation of the yield of excised uracil with incubation time and the amount of hSMUG1. 19U/G were incubated with wild-type or indicated mutant hSMUG1. ( **A** ) Relationship between incubation time and the yield of excised uracil. The amount of protein used were 0.1 ng (wild-type), 1 ng (N163D), 2 ng (N85A), and 100 ng (H239L) ( **B** ) Relationship between the amount of hSMUG1 and the yield of excised uracil.

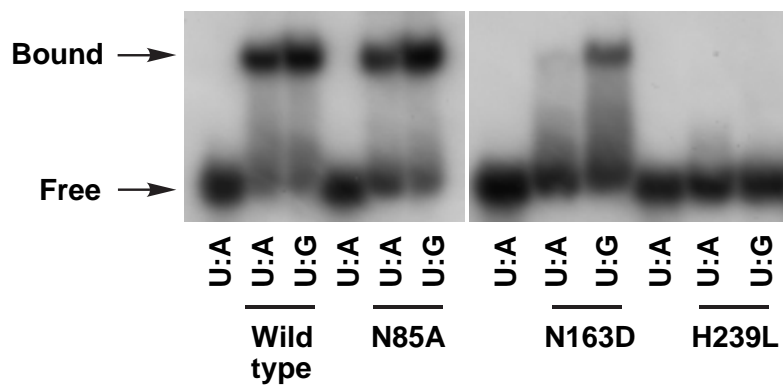

**Figure S3.** Gel electrophoretic mobility shift assays of the binding of the wild-type and mutant hSMUG1 proteins to 19U/A (U:A) and 19U/G (U:G). The assays were performed as described in MATERIALS AND METHODS.
